# Supplementary material for: Prioritization and Selection of High Biomass Energy Producing Plant Species at Boset District, Central Ethiopia: An Ethnobotanical Approach&nbsp;
Source: Research Square preprint supplement (doi:10.21203/rs.3.rs-332588/v1), 2021-03-22
Supplement: Supplementary file 1 [file d1f4997a306a2f7947af7daa.docx]

**Appendix 1.** List of firewood and/or charcoal plant species with high biomass energy at Boset District, east Shewa Zone, Oromia National Regional State, central Ethiopia

| **No** | **Scientific name** | **Family name** | **Habit** | **Status** | **Local name** |
| --- | --- | --- | --- | --- | --- |
| 1 | *Acacia albida* Del. | *Fabaceae* | Tree | Indigenous | Gerbi (Or) |
| 2 | *Acacia dolichocephala* Harms | *Fabaceae* | Tree | Indigenous | Kesele (Or) |
| 4 | *Acacia oerfota* (Forssk.) Schweinf. | *Fabaceae* | Shrub | Indigenous | Ajo (Or) |
| 5 | *Acacia robusta* Burch. | *Fabaceae* | Tree | Indigenous | Wanigayo (Or) |
| 6 | *Acacia senegal* (L.) Willd. | *Fabaceae* | Shrub | Indigenous | Sephensa/Kertefa (Or); Kontir (Am) |
| 7 | *Acacia tortilis* (Forssk.) Hayne | *Fabaceae* | Tree | Indigenous | Tedecha (Or) |
| 8 | *Azadirachta indica* A. Juss. | *Meliaceae* | Tree | Introduced | Genete/Miliya (Or) |
| 9 | *Balanites aegyptiaca* (L.) Del. | *Balanitaceae* | Tree | Indigenous | Bedeno (Or/Am); Jemo (Am) |
| 10 | *Berchemia discolor* (Klotzsch) Hemsl. | *Rhamnaceae* | Tree | Indigenous | Jejeba (Or/Am) |
| 11 | *Dichrostachys cinerea* (L.) Wight & Arn. | *Fabaceae* | Shrub | Indigenous | Ader/Hate (Or) |
| 12 | *Calotropis procera* (Ait.) Ait.f. | *Asclepiadaceae* | Shrub | Introduced | Gura Hare/Bun Gedhe (Or); Tobya/Kinbo (Am) |
| 13 | *Combretum hartimanium* R. Br. ex G. Don | *Combretaceae* | Tree | Indigenous | Debelocha (Or)/Tilem (Am) |
| 14 | *Commiphora habessinica* (Berg) Engl. | *Burseraceae* | Shrub | Indigenous | Hamecha (Or); Anqwa (Am) |
| 15 | *Cryptostegia grandiflora* Roxb. ex R. Br. | *Asclepiadaceae* | Shrub | Introduced | Fenkol/Hakonkol (Or) |
| 16 | *Euclea racemosa* Murr. subsp. *schimperi* (A. DC.) White | *Ebenaceae* | Shrub | Indigenous | Miecha (Or); Dedeho (Am) |
| 17 | *Grewia bicolor* Juss. | *Tiliaceae* | Shrub | Indigenous | Harorecha (Or); Teye (Am) |
| 18 | *Lantana camara* L. | *Verbenaceae* | Shrub | Introduced | Afan Dubra/Midhan Dubra (Or); Yewof Kolo (Am) |
| 19 | *Olea europaea* L. subsp. *cuspidata* (Wall.ex G. Don) Cif. | *Oleaceae* | Tree | Indigenous | Ejersa (Or); Weyra (Am) |
| 20 | *Parthenium hysterophorus* L. | *Asteraceae* | Herb | Introduced | Feremsisa/Ferme/Fermi Basa/Biye Base/Dhukub Lefa (Or) |
| 21 | *Premna resinosa* (Hochst.) Schauer | *Lamiaceae* | Shrub | Indigenous | Argecha (Or) |
| 22 | *Prosopis juliflora* (Sw.) DC. | *Fabaceae* | Shrub | Introduced | Shola/Yeweyane Zaf (Or ) |
| 23 | *Senna occidentalis* (L.) Link | *Fabaceae* | Herb | Introduced | Shewshewe (Or) |
| 24 | *Terminalia brownii* Fresen. | *Combretaceae* | Tree | Indigenous | Birecha (Or); Weyba (Am) |
| 25 | *Ziziphus mucronata* Willd. | *Rhamnaceae* | Tree | Indigenous | Kurkura (Or/Am) |
